# Supplementary material
Source: Research Square preprint supplement (doi:10.21203/rs.3.rs-6832417/v1)

**Table S1. Association of METS-VF, METS-IR, LAP, VAI, and CMI with Significant Fibrosis**

|  | **Model1 OR(95%CI)** | **Model2 OR(95%CI)** | **Model3 OR(95%CI)** |
| --- | --- | --- | --- |
| **METS-VF** |  |  |  |
| Q1 | Reference | Reference | Reference |
| Q2 | 0.925（0.301，2.840） | 1.034（0.329，3.251） | 1.081 （0.273，4.279） |
| Q3 | 1.102（0.474，2.560） | 1.302（0.487 3.476） | 1.277（0.429，3.800） |
| Q4 | 4.529（2.000，10.055）*** | 5.638（1.535，20.714）* | 4.552（0.993，20.864） |
| P for trend | ＜0.01 | ＜0.05 | ＞0.05 |
| **METS-IR** |  |  |  |
| Q1 | Reference |  |  |
| Q2 | 0.194(0.075,0.506)** | 0.157(0.049,0.505)** | 0.160(0.040,0.644)* |
| Q3 | 0.793(0.316,1.993) | 0.624(0.199,1.957) | 0.571(0.149,2.194) |
| Q4 | 2.986(1.257,7.093)* | 2.583(0.941,7.096)** | 2.115(0.642,6.962) |
| P for trend | ＞0.05 | ＞0.05 | ＞0.05 |
| **LAP** |  |  |  |
| Q1 | Reference | Reference | Reference |
| Q2 | 0.784(0.253,2.429) | 0.784(0.224,2.286) | 0.774(0.196,3.056) |
| Q3 | 1.626(0.763,3.468) | 1.626(0.597,3.701) | 1.485(0.525,4.196) |
| Q4 | 3.304(1.414,7.717)** | 3.304(1.050,8.233)* | 2.765(0.747,10.234) |
| P for trend | ＜0.001 | ＜0.01 | ＜0.05 |
| **VAI** |  |  |  |
| Q1 | Reference | Reference | Reference |
| Q2 | 1.243(0.603,2.562) | 1.133(0.498,2.575) | 1.104(0.445,2.741) |
| Q3 | 1.067(0.553,2.059) | 0.963(0.463,2.005) | 0.805(0.377,1.718) |
| Q4 | 2.224(1.202,4.112)* | 2.013（0.997，4.063） | 1.693(0.702,4.083) |
| P for trend | ＜0.05 | ＜0.05 | ＞0.05 |
| **CMI** |  |  |  |
| Q1 | Reference | Reference | Reference |
| Q2 | 0.831(0.291,2.371) | 0.749(0.214,2.623) | 0.740(0.180,3.042) |
| Q3 | 1.910(0.594,2.384) | 1.044(0.456,2.392) | 0.925(0.366,2.338) |
| Q4 | 2.415(1.159,5.034)* | 2.037（0.815,5.093） | 1.735(0.600,5.018) |
| P for trend | ＜0.001 | ＜0.05 | ＞0.05 |

Model 1: no covariates were adjusted；

Model 2: Gender, Age, Race, Marital status, Education level, PIR, Alcohol use and smoking were adjusted；

Model 3: Gender, Age, Race, Marital, Education level, PIR, Alcohol use and smoking, Hyptersion, Diabetes Mellitus and Hyperlipidemia were adjusted.

**Fig. 3. ROC curves of METS-VF, METS-IR, LAP, VAI, CMI and FIB-4**


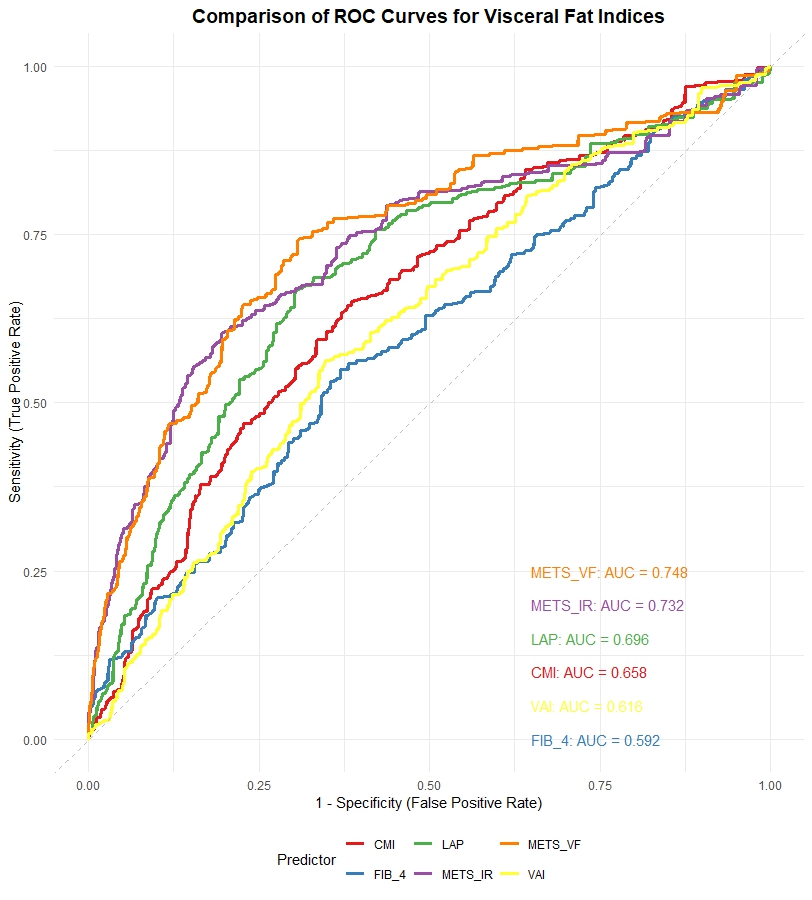

Supplement: Supplementary file 1 [file e14502b0dc4f461f6bc1ecbc.docx]
